# Supplementary material for: SARS-CoV-2 N protein promotes NLRP3 inflammasome activation to induce hyperinflammation
Source: PubMed Central journal article supplement (PMC8329225; doi:10.1038/s41467-021-25015-6), 2021-08-02
Supplement: 41467_2021_25015_MOESM1_ESM.pdf [file 41467_2021_25015_MOESM1_ESM.pdf]

1 **SARS-CoV-2 N promotes the NLRP3 inflammasome activation to induce hyperinflammation**

2

3

4

5 **Supplementary Information**

6

7 Supplementary Figures and Legends

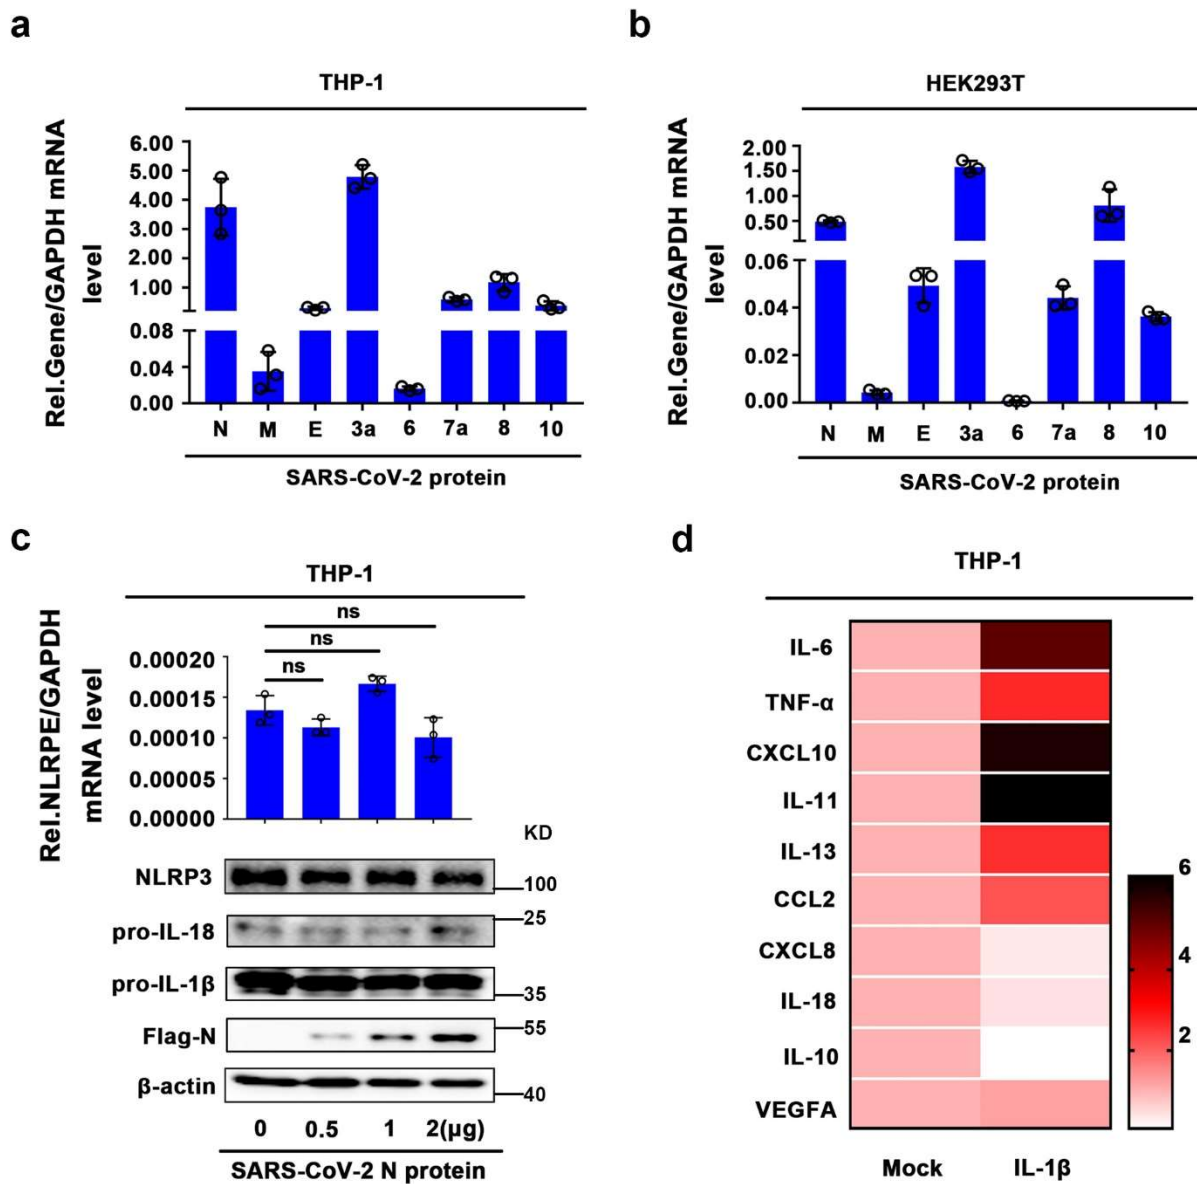

8

9 **Supplementary Fig. 1. SARS-CoV-2 N protein induces proinflammatory responses. (a, b)**

10 PMA-differentiated THP-1 macrophages (a) or HEK293T cells (b) were transfected with plasmids

11 encoding SARS-CoV-2 N, M, E, 3a, 6, 7a, 8, and 10 proteins at 2 μg for 48 h. The mRNA levels of

12 indicated genes were quantified by qRT-PCR. Mock means untreated cells. (c) PMA-differentiated

13 THP-1 macrophages were transfected with plasmids encoding SARS-CoV-2 N at different

14 concentrations for 48 h. NLRP3 mRNA was quantified by qRT-PCR. Proteins in the cell lysates  
15 were analyzed by immunoblotting. **(d)** PMA-differentiated THP-1 macrophages were stimulated  
16 with human IL-1 $\beta$  (100 ng/ml) for 2 h. The mRNA levels of indicated genes were quantified by  
17 qRT-PCR. Data are representative of three independent experiments and one representative is shown.  
18 Error bars indicate SD of technical triplicates, ns means not significant , two-tailed Student's t-test.  
19 Source data are provided as a Source Data file.

20

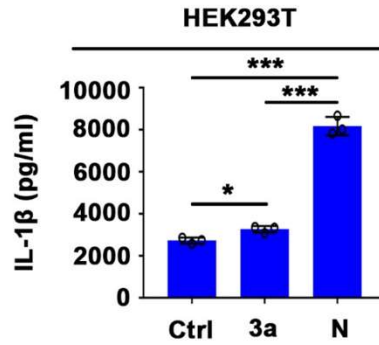

21

22 **Supplementary Fig. 2. The effects of SARS-CoV-2 N and 3a proteins on IL-1β production.**

23 HEK293T cells were co-transfected with plasmids encoding NLRP3, ASC, pro-Casp1, and pro-IL-  
 24 1β, and then transfected with plasmids encoding N protein or 3a protein for 48 h. The levels of IL-1β  
 25 protein in the supernatants were analyzed by ELISA. Ctrl means transfected with empty plasmids.

26 Data are representative of three independent experiments and one representative is shown. Error bars  
 27 indicate SD of technical triplicates,  $P \leq 0.05$  (\*),  $P \leq 0.01$  (\*\*),  $P \leq 0.001$  (\*\*\*), two-tailed Student's t-  
 28 test. Source data are provided as a Source Data file.

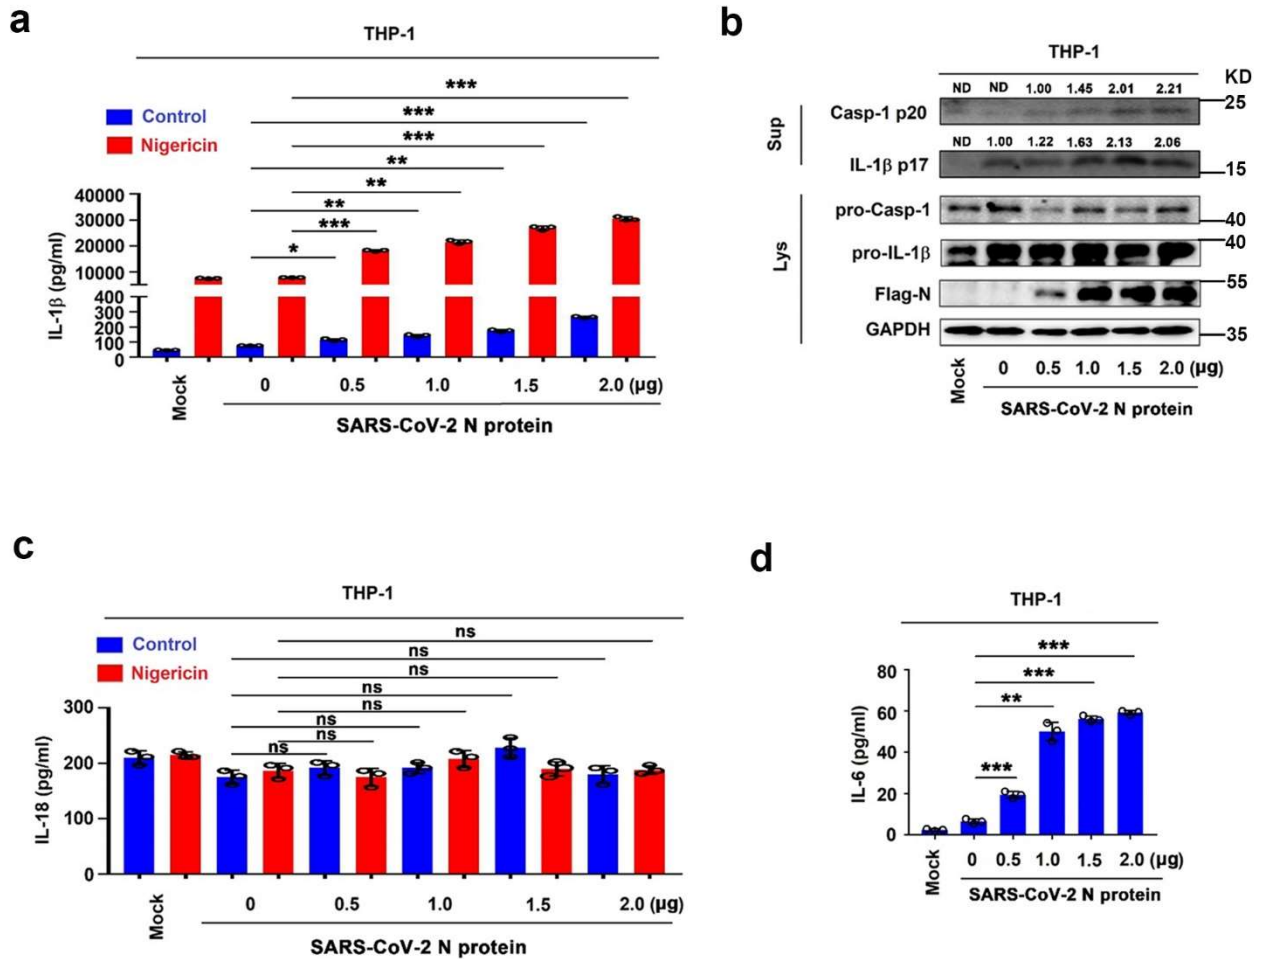

29

30

**Supplementary Fig. 3. SARS-CoV-2 N induces IL-1β and IL-6 production. (a–d)** PMA-

31

differentiated THP-1 macrophages were transfected with plasmids encoding different concentrations

32

of SARS-CoV-2 N for 48 h, then stimulated with 2 μM Nigericin or DMSO for 2 h. IL-1β (a), IL-18

33

(c) or IL-6 (d) in cell supernatants was measured by ELISA. Cell lysates were analyzed (b) by

34

immunoblotting. Data are representative of three independent experiments and one representative is

35

shown. Error bars indicate SD of technical triplicates,  $P \leq 0.05$  (\*),  $P \leq 0.01$  (\*\*),  $P \leq 0.001$  (\*\*\*), ns

36

means not significant, two-tailed Student's t-test. Source data are provided as a Source Data file.

37

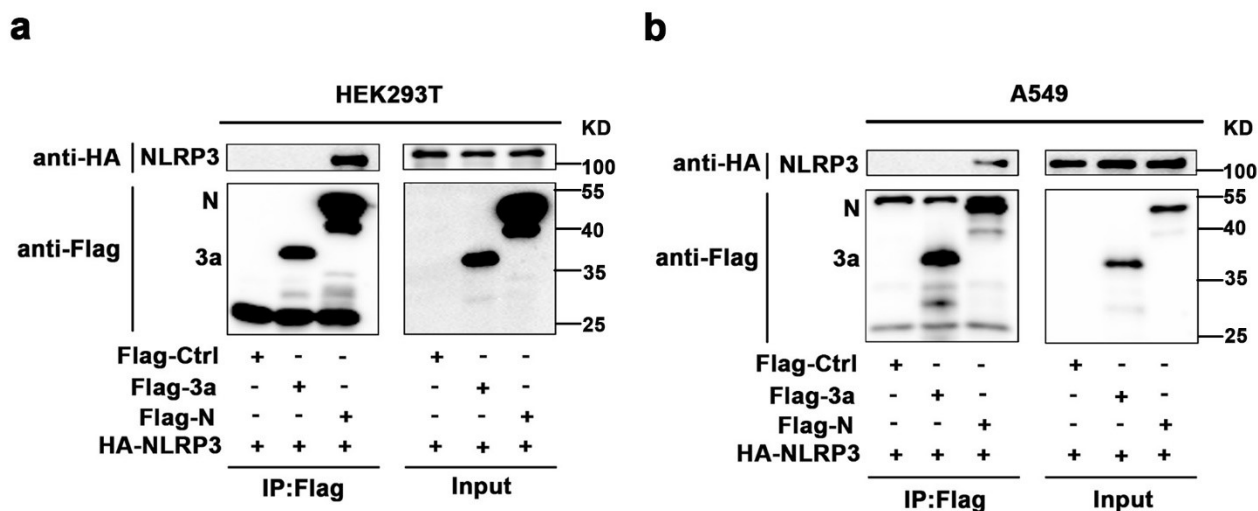

38

39 **Supplementary Fig. 4. SARS-CoV-2 3a protein fails to interact with NLRP3.** (a, b) HEK293T

40 cells (a) or A549 cells (b) were co-transfected with HA-NLRP3 and Flag-N or Flag-3a. Proteins if

41 the cell lysates were immunoprecipitated using anti-HA antibody and analyzed using anti-Flag and

42 anti-HA antibody. Cell lysates (40 µg) was used as Input. Flag-Ctrl means transfected with empty

43 plasmids. Data are representative of three independent experiments and one representative is shown.

44 Source data are provided as a Source Data file.

45

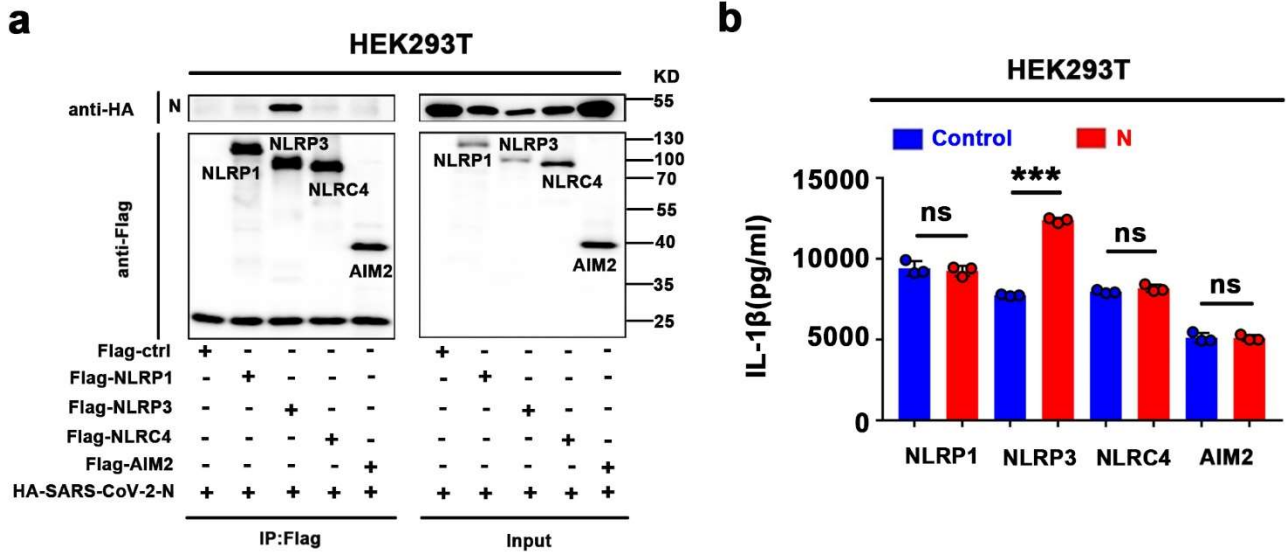

46

47 **Supplementary Fig. 5. SARS-CoV-2 N protein interacts with NLRP3 and activates NLRP3**

48 **inflammasome.** (a) HEK293T cells were co-transfected with HA-N and Flag-NLRP1, Flag-NLRP3,

49 Flag-NLRC4, and Flag-AIM2 for 24 h. Proteins in the cell lysates were immunoprecipitated using

50 anti-HA antibody and analyzed using anti-HA and anti-Flag antibody. Cell lysates (40  $\mu$ g) were used

51 as Inputs. (b) HEK293T cells were respectively co-transfected with plasmids encoding

52 NLRP1 inflammasome (NLRP1, pro-Casp1 and pro-IL-1 $\beta$ ), NLRP3 inflammasome (NLRP3, ASC,

53 pro-Casp1 and pro-IL-1 $\beta$ ), NLRC4 inflammasome (NLRC4, ASC, pro-Casp1 and pro-IL-1 $\beta$ ), AIM2

54 inflammasome (AIM2, ASC, pro-Casp1 and pro-IL-1 $\beta$ ), and transfected with plasmids encoding

55 SARS-CoV-2 N for 48 h. Supernatants were analyzed by ELISA for IL-1 $\beta$ . Flag-Ctrl (a) and Control

56 (b) mean transfected with empty plasmids. Data are representative of three independent experiments

57 and one representative is shown. Error bars indicate SD of technical triplicates,  $P \leq 0.05$  (\*),  $P \leq 0.01$

58 (\*\*),  $P \leq 0.001$  (\*\*\*), ns means not significant, two-tailed Student's t-test. Source data are provided

59 as a Source Data file.

**a**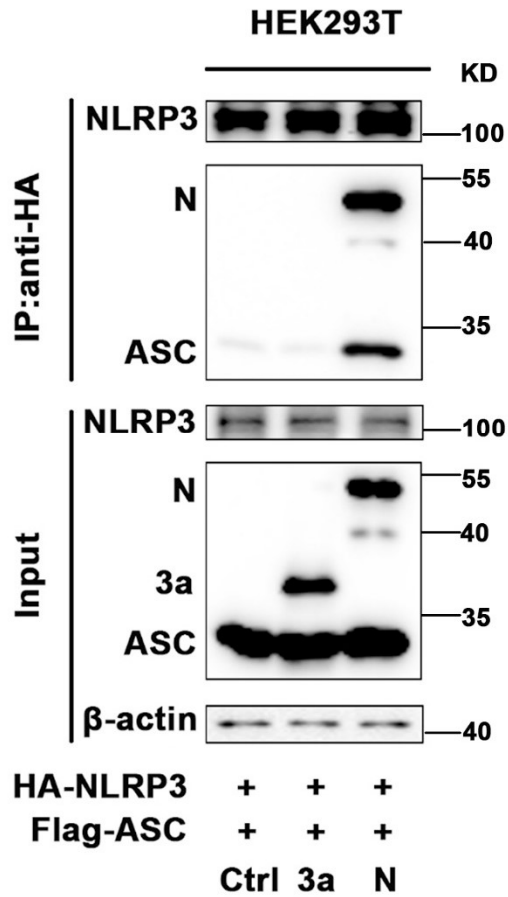**b**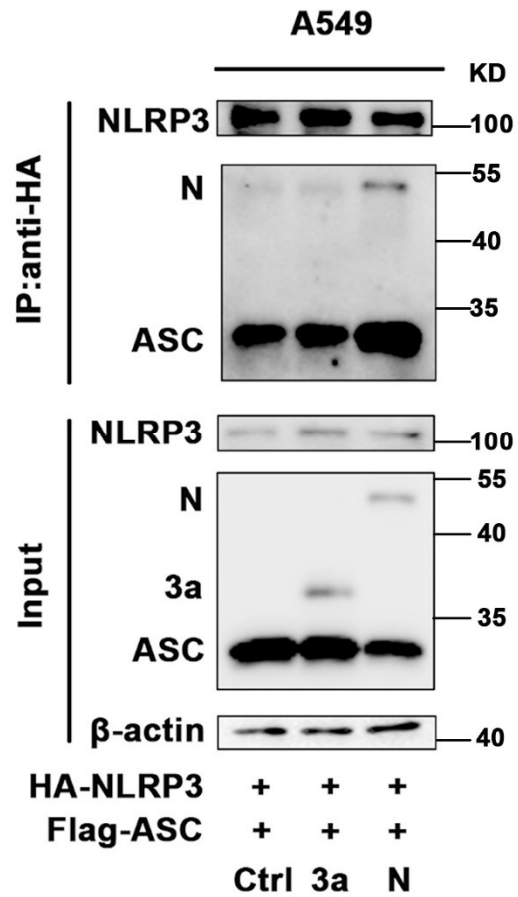

60

61 **Supplementary Fig. 6. SARS-CoV-2 3a protein displays no effect on NLRP3-ASC interaction.**62 **(a, b)** HEK293T cells (a) or A549 cells (b) were co-transfected with Flag-N or Flag-3a, HA-NLRP3

63 and Flag-ASC for 24 h. Proteins in the cell lysates were immunoprecipitated using anti-Flag

64 antibody and analyzed using anti-HA and anti-Flag antibody. Cell lysates (40 µg) were used as

65 Inputs. Ctrl means transfected with empty plasmids. Data are representative of three independent

66 experiments and one representative is shown. Source data are provided as a Source Data file.



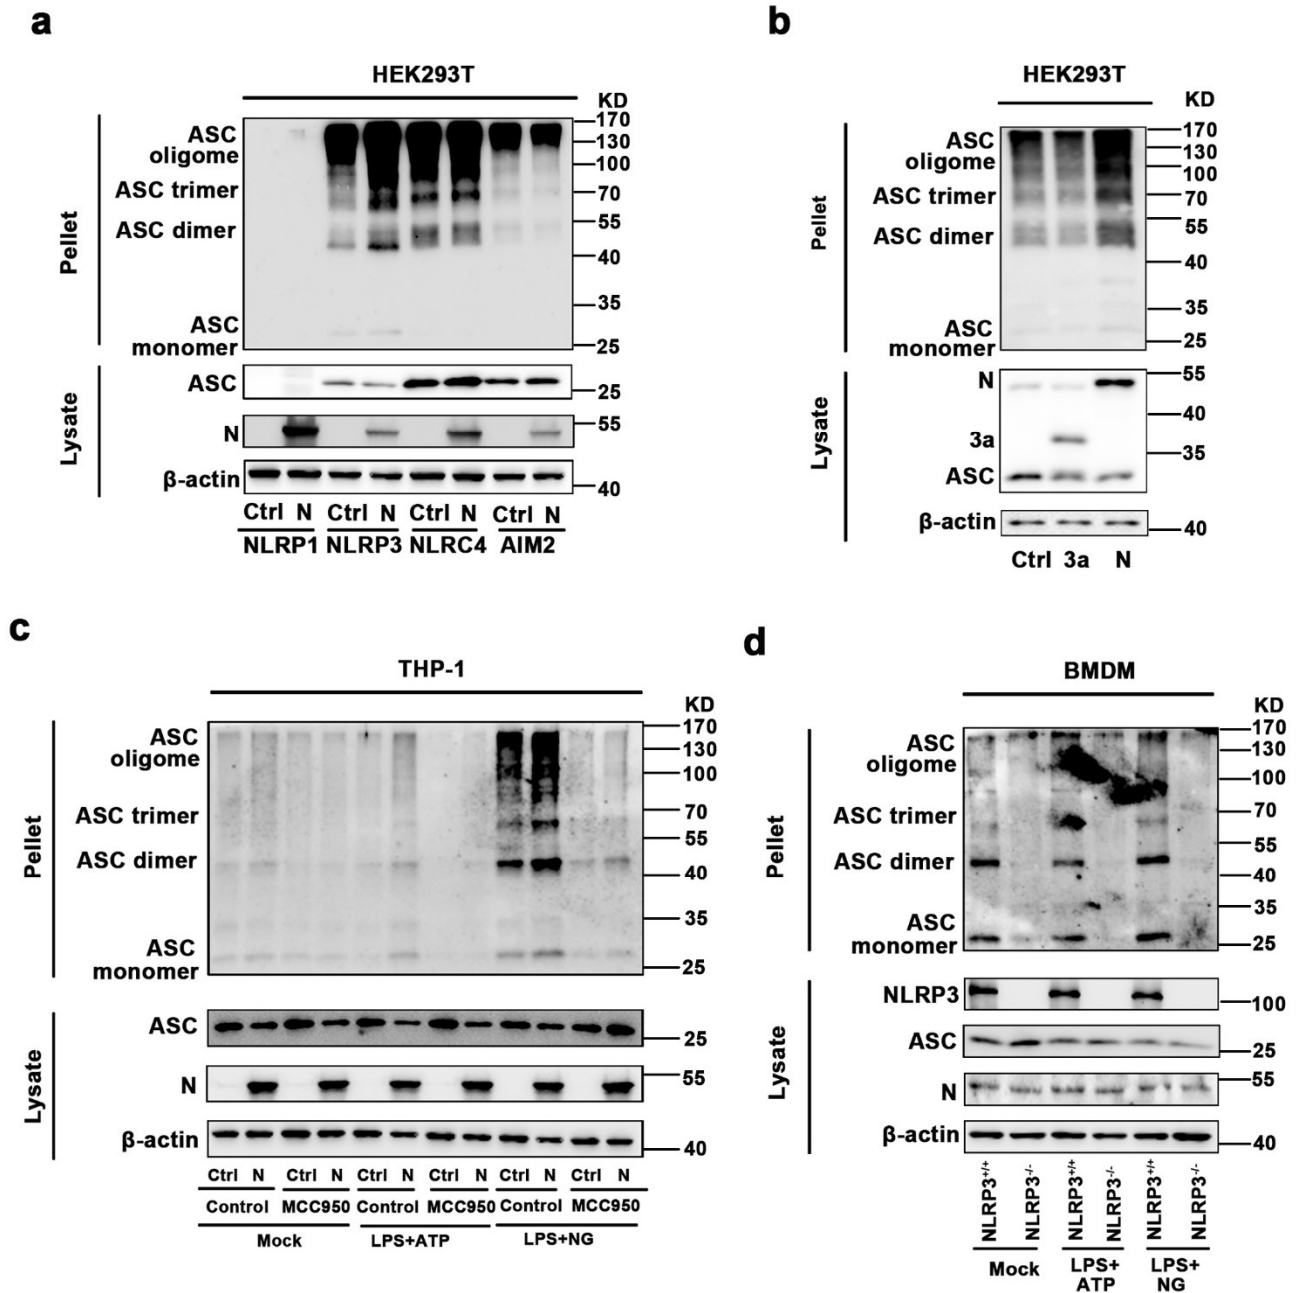

67

68 **Supplementary Fig. 7. SARS-CoV-2 N protein promotes NLRP3-induced ASC oligomerization.**

69 (a) HEK293T cells were respectively co-transfected with plasmids encoding NLRP1 inflammasome  
 70 (NLRP1, pro-Casp1, and pro-IL-1 $\beta$ ), NLRP3 inflammasome (NLRP3, ASC, pro-Casp1, and pro-IL-  
 71 1 $\beta$ ), NLRC4 inflammasome (NLRC4, ASC, pro-Casp1 and pro-IL-1 $\beta$ ), AIM2 inflammasome  
 72 (AIM2, ASC, pro-Casp1, and pro-IL-1 $\beta$ ), and transfected with plasmids encoding SARS-CoV-2 N

73 for 48 h. ASC oligomerization was analyzed by immunoblotting. **(b)** HEK293T cells were co-  
74 transfected with plasmids encoding NLRP3, ASC, pro-Casp1, and pro-IL-1 $\beta$ , and then transfected  
75 with plasmids encoding SARS-CoV-2 N protein or 3a protein for 48 h. ASC oligomerization was  
76 analyzed by immunoblotting. **(c)** THP-1 macrophages were stably infected with Lentivirus-CT or  
77 Lentivirus-N, differentiated into macrophages. The cells were treated with MCC950 (0.01  $\mu$ M) for 1  
78 h, and then stimulated with LPS (1  $\mu$ g/ml) plus ATP (2.5 mM) or LPS (1  $\mu$ g/ml) plus Nigericin (2  
79  $\mu$ M). ASC oligomerization was analyzed by immunoblotting. **(d)** GM-CSF differentiated *NLRP3*<sup>+/+</sup>  
80 mice and *NLRP3*<sup>-/-</sup> mice BMDMs were infected with Lentivirus-N and then stimulated with LPS (1  
81  $\mu$ g/ml), LPS (1  $\mu$ g/ml) plus ATP (2.5 mM), or LPS (1  $\mu$ g/ml) plus Nigericin (2  $\mu$ M). ASC  
82 oligomerization was analyzed by immunoblotting. Data are representative of three independent  
83 experiments and one representative is shown. Source data are provided as a Source Data file.

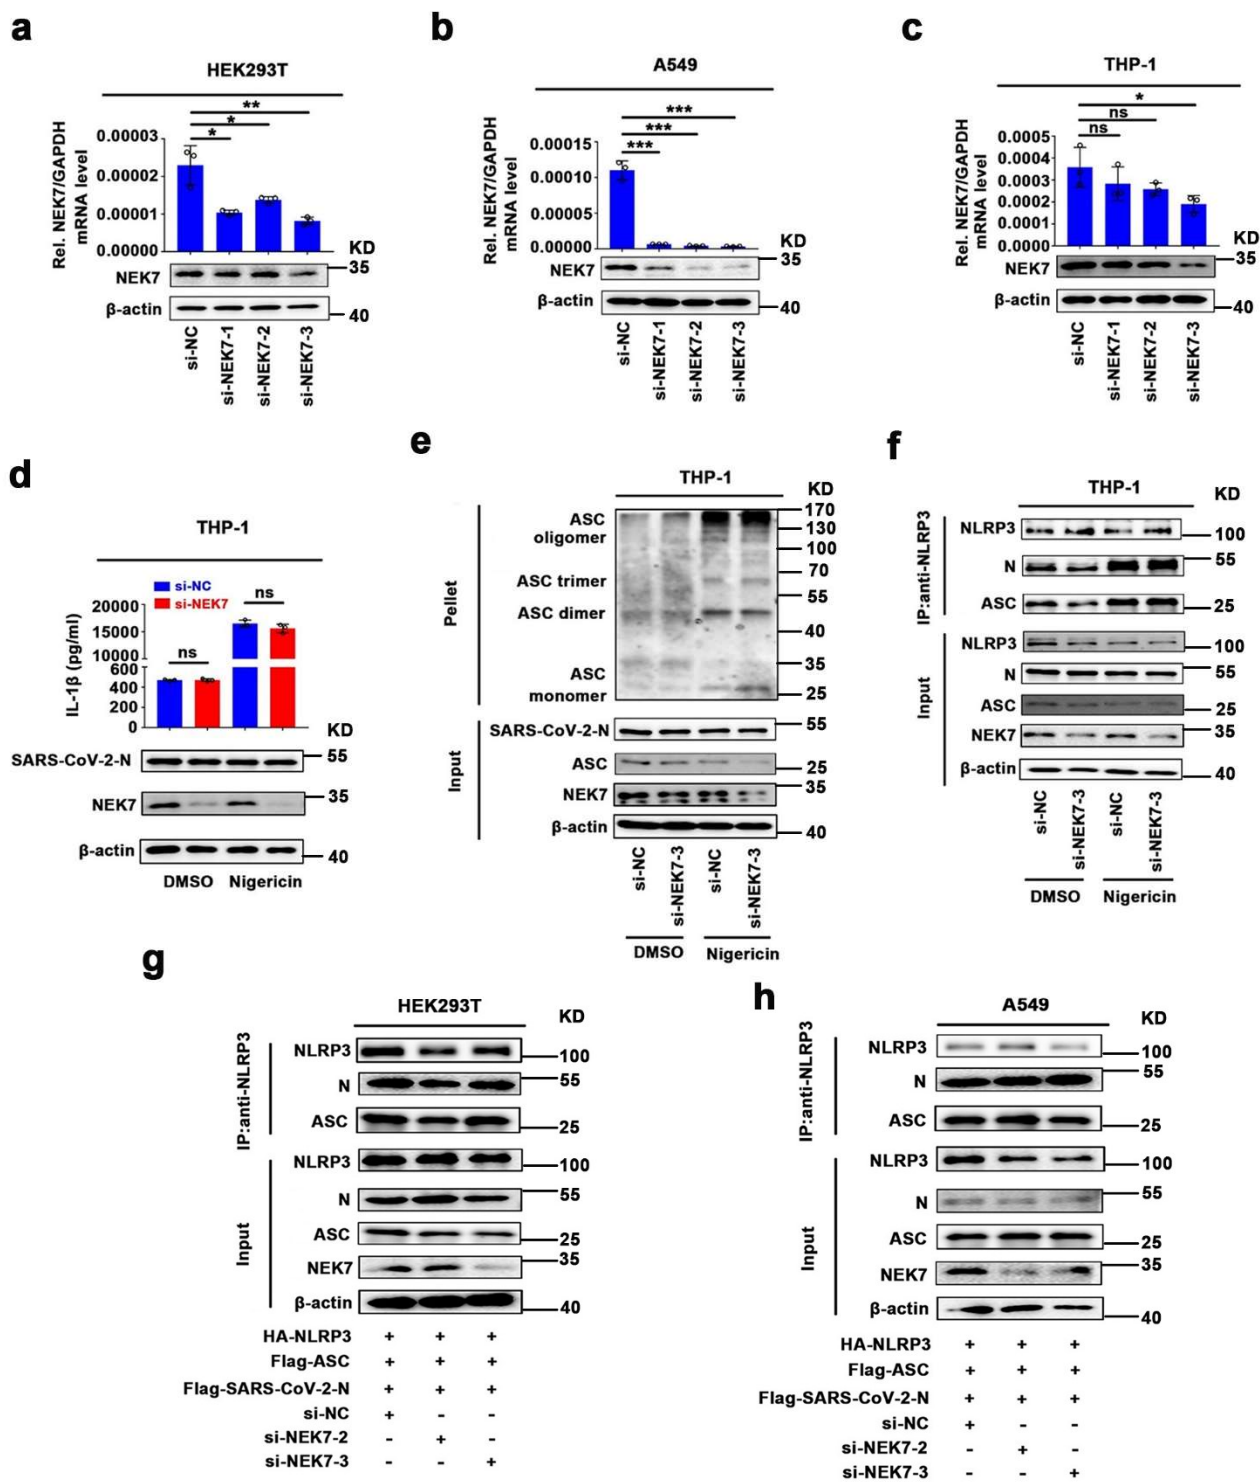

84

85 **Supplementary Fig. 8. NEK7 is not required for N protein mediated inflammasome activation**

86 **and NLRP3-ASC interaction. (a-c)** HEK293T cells, A549 cells, or PMA-differentiated THP-1

87 macrophages were respectively transfected with si-NC, si-NEK7-1, si-NEK7-2, or si-NEK7-3 (50

88 nM) for 48 h. NEK7 mRNA was quantified by RT-PCR and NEK7 protein in lysates was analyzed  
89 by WB. **(d–f)** THP-1 macrophages were stably infected with Lentivirus-N were transfected with si-  
90 NC or si-NEK7-3 (50 nM) for 48 h, and stimulated with 2  $\mu$ M Nigericin or DMSO for 2 h. IL-1 $\beta$   
91 protein in the supernatants was analyzed by ELISA (d, top). Proteins in the cell lysates were  
92 analyzed by immunoblotting (d, bottom). ASC oligomerization was analyzed by immunoblotting (e).  
93 Cell lysates were immunoprecipitated using anti-NLRP3 antibody, and analyzed using anti-NLRP3,  
94 anti-ASC, anti- $\beta$ -actin, and anti-N antibody (f). **(g, h)** HEK293T cells (g) or A549 cells (h) were  
95 transfected with si-NC, si-NEK7-2, or si-NEK7-3 (50 nM) for 24 h, and then co-transfected with  
96 Flag-SARS-CoV-2-N or 3a plus HA-NLRP3 and Flag-ASC for 24 h. Cell lysates were  
97 immunoprecipitated using anti-NLRP3 antibody, and analyzed using anti-NLRP3, anti-ASC, anti- $\beta$ -  
98 actin, anti-NEK7 and anti-N antibody. Ctrl means transfected with empty plasmids. Data are  
99 representative of three independent experiments and one representative is shown. Error bars indicate  
100 SD of technical triplicates,  $P \leq 0.05$  (\*),  $P \leq 0.01$  (\*\*),  $P \leq 0.001$  (\*\*\*), ns means not significant, two-  
101 tailed Student's t-test. Source data are provided as a Source Data file.

102

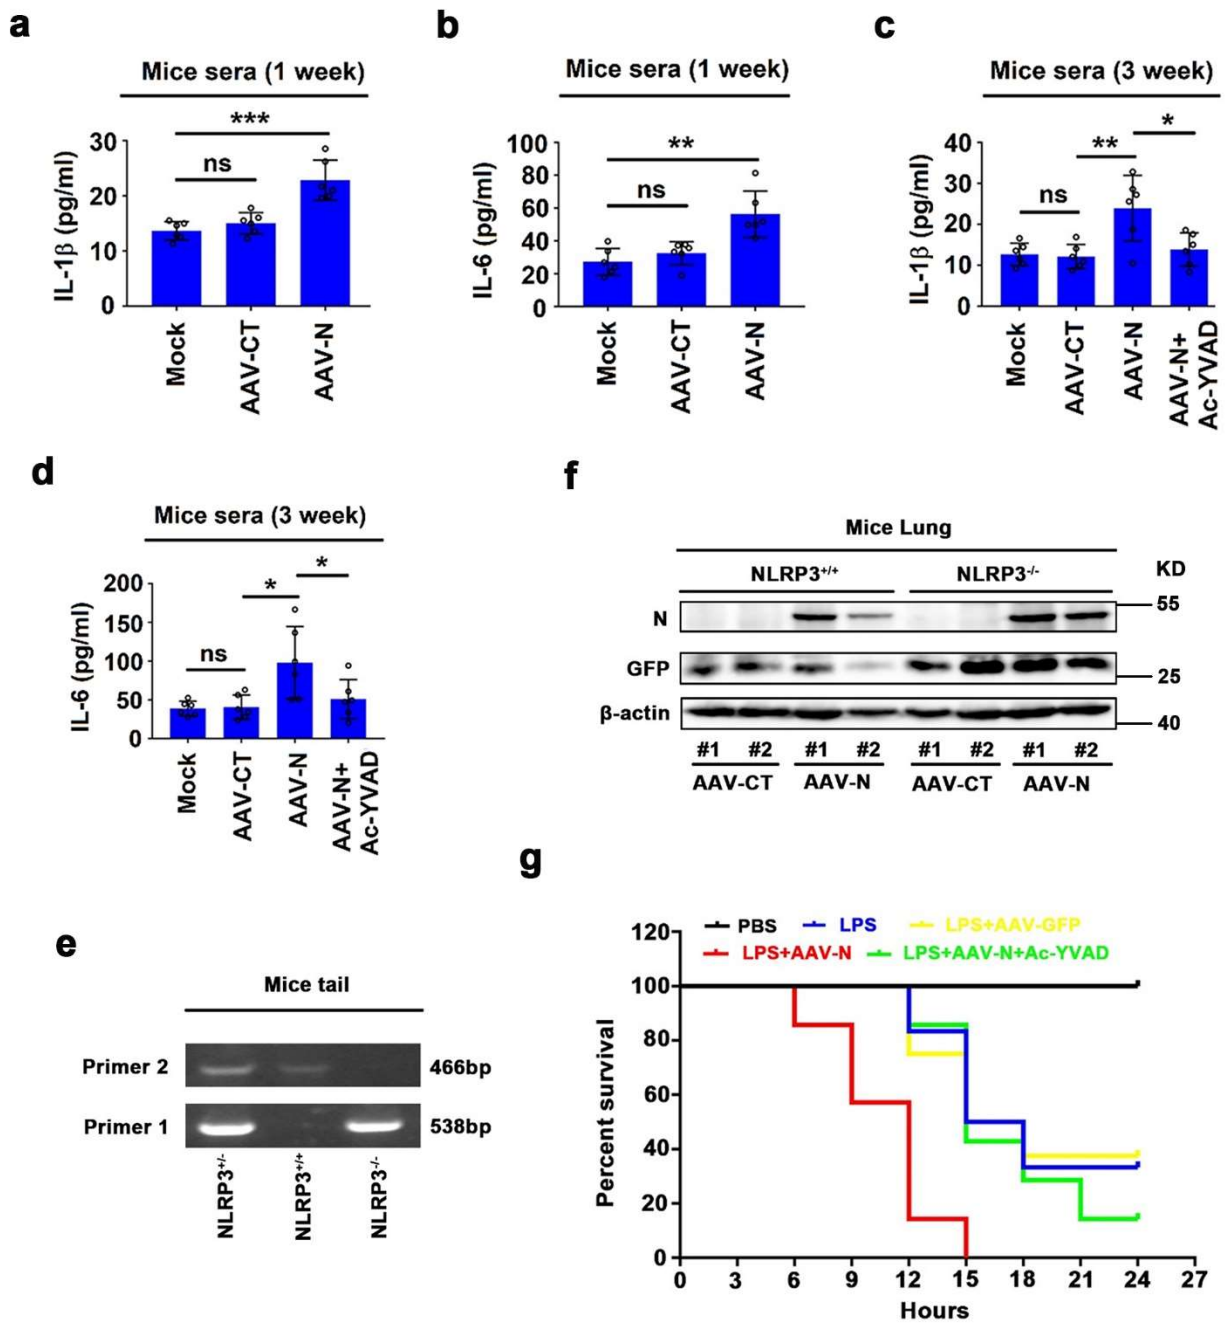

103

104 **Supplementary Fig. 9. SARS-CoV-2 N protein induces mice lung injury via activating the**  
 105 **NLRP3 inflammasome.** (a–d) C57BL/6 genetic background mice were tail vein injection with 300  
 106  $\mu$ l containing  $5 \times 10^{11}$  vg of AAV-Lung-EGFP (n=6) or AAV-Lung-N (n=16), after two weeks,  
 107 treated with Ac-YVAD-cmk (8 mg/kg) by intraperitoneal injection for AAV-Lung-N (n=6) mice.  
 108 Serum was collected at one week and three weeks for each group from the orbit. IL-1 $\beta$  (a and c) or

109 IL-6 (b and d) in the sera was measured by ELISA. Points represent the value of each serum samples.  
110 (e) The total genome DNA was extracted from the tail of *NLRP3*<sup>+/+</sup> mice, *NLRP3*<sup>+/-</sup> mice or  
111 *NLRP3*<sup>-/-</sup> mice. NLRP3 DNA was detected by specific primers. (f) *NLRP3*<sup>+/+</sup> C57BL/6 mice or  
112 *NLRP3*<sup>-/-</sup> C57BL/6 mice were tail vein injection with 300  $\mu$ l containing  $5 \times 10^{11}$  vg of AAV-Lung-  
113 EGFP (n=4) or AAV-Lung-N (n=7). The indicated proteins were analyzed by WB. (g) After four  
114 weeks, pretreated with DMSO for AAV-Lung-N (n=7) mice or Ac-YVAD-cmk (8 mg/kg) for  
115 another AAV-Lung-N (n=7) mice. After 30 min, mock group (n=6), AAV-Lung-EGFP (n=7) group,  
116 AAV-Lung-N (n=7) group and another AAV-Lung-N (n=7) group were treated with LPS (30 mg/kg)  
117 by intraperitoneal injection. Another mock group (n=4) was intraperitoneal injected with PBS. Then  
118 the mice survival rates were evaluated every two hours posttreatment. Mock means inject the same  
119 dose of PBS as other groups (a-d). Data are representative of two independent experiments and one  
120 representative is shown. Error bars indicate SD of each serum samples (a-d).  $P \leq 0.05$  (\*),  $P \leq 0.01$   
121 (\*\*),  $P \leq 0.001$  (\*\*\*), two-tailed Student's t-test (a-d). One-way ANOV analysis (g). Source data are  
122 provided as a Source Data file.

123

124

125 **Supplementary Tables**126 **Supplementary Table 1. qRT-PCR Primers used in this study.**

| <b>Name</b>            | <b>Forward</b>                       | <b>Reverse</b>                    |
|------------------------|--------------------------------------|-----------------------------------|
| Human IL-1 $\beta$     | 5'-<br>CACGATGCACCTGTACGATCA-3'      | 5'-GTTGCTCCATATCCTGTCCCT-<br>3'   |
| Human<br>IL-6          | 5'-<br>GTACATCCTCGACGGCATCTCA-<br>3' | 5'-<br>GCACAGCTCTGGCTTGTTCCCTC-3' |
| Human<br>TNF- $\alpha$ | 5'-TCTCGAACCCCGAGTGACA-3'            | 5'-GCCCGGCGGTTCA-3'               |
| Human<br>CXCL10        | 5'-ACTGTACGCTGTACCTGCAT-<br>3'       | 5'-ACACGTGGACAAAATTGGCT-<br>3'    |
| Human GAPDH            | 5'-AAGGCTGTGGGCAAGG-3'               | 5'-TGGAGGAGTGGGTGTCG-3'           |
| Human<br>IL-11         | 5'-GAACTGTGTTTGCCGCCTGG-<br>3'       | 5'-GTCTGGGGAAACTCGAGGGG-<br>3'    |
| Human<br>IL-13         | 5'-CATGGCGCTTTTGTTGACCA-<br>3'       | 5'-AGCTGTCAGGTTGATGCTCC-<br>3'    |

|                      |                                         |                                       |
|----------------------|-----------------------------------------|---------------------------------------|
| Human<br>CCL2        | 5'-<br>TGCAATCAATGCCCCAGTCA-3'          | 5'-GGGTCAGCACAGATCTCCTT-<br>3'        |
| Human<br>CXCL8       | 5'-<br>CAGTTTTGCCAAGGAGTGCT-3'          | 5'-GTTTTTCCTTGGGGTCCAGACA-<br>3'      |
| Human<br>IL-18       | 5'-<br>ACGCTTTACTTTATAGCTGAAG<br>ATG-3' | 5'-GAGGCCGATTCCTTGGTCA-<br>3'         |
| Human<br>IL-10       | 5'-<br>AGGCAACCTGCCTAACATGC-3'          | 5'-GTTCTCAGCTTGGGGCATCA-<br>3'        |
| Human<br>VEGFA       | 5'-<br>TGCGGATCAAACCTCACCAA-3'          | 5'-ACCAACGTACACGCTCCAG-3'             |
| Mice<br>IL-1 $\beta$ | 5'-<br>TGCCACCTTTTGACAGTGATG-<br>3'     | 5'-TGTGCTGCTGCGAGATTTGA-<br>3'        |
| Mice<br>IL-6         | 5'-<br>AGACAAAGCCAGAGTCCTTCA<br>GAGA-3' | 5'-<br>GCCACTCCTTCTGTGACTCCAGC<br>-3' |



|                       |                                        |                                |
|-----------------------|----------------------------------------|--------------------------------|
| Mice<br>TNF- $\alpha$ | 5'-<br>ACGTGGAAGTGGCAGAAGAG-<br>3'     | 5'-CTCCTCCACTTGGTGGTTTG-3'     |
| Mice<br>CXCL10        | 5'-GTGCTGCCGTCATTTTCTGC-<br>3'         | 5'-AAGCTTCCCTATGGCCCTCA-<br>3' |
| Mice<br>CCL2          | 5'-<br>CCTGCTGCTACTCATTACCA-<br>3'     | 5'-ATTCCTTCTTGGGGTCAGCA-<br>3' |
| Mice<br>IL-11         | 5'-GAACTGTGTTTGTGCGCCTGG-<br>3'        | 5'-TGCTCGAGGGTCTGAAGAGA-<br>3' |
| Mice<br>IL-1 $\beta$  | 5'-GAGGCCGATTTCTTGGTCA-<br>3'          | 5'-GAGGCCGATTTCTTGGTCA-<br>3'  |
| Mice<br>VEGFA         | 5'-<br>CCCACGTCAGAGAGCAACAT-3'         | 5'-TGCCTTTCGTTTTTGACCC-3'      |
| Mice<br>IL-7          | 5'-<br>CGATGAATTGGACAAAATGAC<br>AGG-3' | 5'-TGCGAGCAGCACGATTTAGA-<br>3' |

|                        |                                    |                                     |
|------------------------|------------------------------------|-------------------------------------|
| Mice<br>CXCL8          | 5'-<br>CCTGATGCTCCATGGGTGAA-3'     | 5'-ACAGAAGCTTCATTGCCGGT-<br>3'      |
| Mice<br>IL-12A         | 5'-CTCAGTTTGGCCAGGGTCAT-<br>3'     | 5'-GTCTTCAGCAGGTTTCGGGA-<br>3'      |
| Mice<br>IL-18          | 5'-<br>TCAGACAAC TTTGGCCGACT-3'    | 5'-CAGTCTGGTCTGGGGTTCAC-<br>3'      |
| Mice<br>IL-15          | 5'-<br>GGGCTGTGTCAGTGTAGGTC-3'     | 5'-<br>TGCAATTCCAGGAGAAAGCAG-<br>3' |
| Mice<br>IL-10          | 5'-<br>GCATGGCCCAGAAATCAAGG-<br>3' | 5'-GAGAAATCGATGACAGCGCC-<br>3'      |
| Mice<br>$\beta$ -actin | 5'-<br>AGAGGGAAATCGTGCGTGAC-<br>3' | 5'-<br>CAATAGTGATGACCTGGCCGT-3'     |
| Human<br>NLRP3         | 5-AAGGGCCATGGACTATTTCC-<br>3'      | 5'-GACTCCACCCGATGACAGT<br>T-3'      |

|                  |                                     |                                      |
|------------------|-------------------------------------|--------------------------------------|
| Human<br>NEK7    | 5-CAGATGCTGGCGACCTATCC-<br>3'       | 5'-TCCAATGCACTGCAAAGCTG-<br>3'       |
| SARS-CoV-2<br>N  | 5-ACCCGCAATCCTGCTAACAA-<br>3'       | 5-ACGAGAAGAGGCTTGACTGC-<br>3'        |
| SARS-CoV-2<br>M  | 5-GTGCCACTCCATGGCACTAT-<br>3'       | 5'-TCCTTGATGTCACAGCGTCC-<br>3'       |
| SARS-CoV-2<br>E  | 5-<br>TTCGTTTCGGAAGAGACAGGT-<br>3'  | 5-GCGCAGTAAGGATGGCTAGT-<br>3'        |
| SARS-CoV-2<br>3a | 5-GCTTTGCTGGAAATGCCGTT-<br>3'       | 5'-GGACTTGTTGTGCCATCAC<br>C-3'       |
| SARS-CoV-2<br>6  | 5-<br>TCATCTCGTTGACTTTCAGGTT-<br>3' | 5-<br>TCTCCATTGGTTGCTCTTCATCT-<br>3' |
| SARS-CoV-2<br>7a | 5-TGGCACTGATAAACACTCGCT-<br>3'      | 5-CCGTCAGGACAAGCAAAAAGC-<br>3'       |
| SARS-CoV-2<br>8  | 5-GAATTGTGCGTGGATGAGGC-<br>3'       | 5-ACCCAATTTAGGTTCTGGCA-<br>3'        |

|                  |                                 |                                       |
|------------------|---------------------------------|---------------------------------------|
| SARS-CoV-2<br>10 | 5'-AACGTTTTTCGCTTTTCCGTT-<br>3' | 5-<br>TCTACTTGTGCTATGTAGTTACG<br>A-3' |
|------------------|---------------------------------|---------------------------------------|

127

128 **Supplementary Table 2. Clone Primers used in this study.**

| <b>Name</b> | <b>Forward</b>                              | <b>Reverse</b>                             |
|-------------|---------------------------------------------|--------------------------------------------|
| N1          | 5'-<br>GCGGATCCATGTCTGATAATGG<br>ACCCCAA-3' | 5'-<br>GCTCTAGATTAAATGCGCGACATTCC<br>GA-3' |
| N2          | 5'-<br>GCGGATCCATGTCTGATAATGG<br>ACCCCAA-3' | 5'-<br>GCTCTAGATTATTGCCGAGGCTTCTT<br>AG-3' |
| N3          | 5'-<br>GCGGATCCATGTCTGATAATGG<br>ACCCCAA-3' | 5'-<br>GCTCTAGATTAAGTCCGCCTCTGCT<br>C-3'   |
| N4          | 5'-<br>GCGGATCCATGTCTGATAATG<br>GACCCCAA-3' | 5'-<br>CGTCTAGATTAAGCTCTTCGGTAGT<br>AGC-3' |
| N5          | 5'-<br>GCGGATCCATGACCAGACGA<br>ATTCG-3'     | 5'-<br>GCTCTAGATTAGGCCTGAGTTGAGT<br>C-3'   |

|    |                                             |                                          |
|----|---------------------------------------------|------------------------------------------|
| N6 | 5'-<br>GCGGATCCATGCAAGCCTCTT<br>CTCGT-3'    | 5'-<br>GCTCTAGATTAGGCCTGAGTTGAGT<br>C-3' |
| N7 | 5'-<br>GCGGATCCATGAAACGTA<br>CTG<br>CCAC-3' | 5'-<br>GCTCTAGATTAGGCCTGAGTTGAGT<br>C-3' |
| N8 | 5'-<br>GCGGATCCATGGACAAAGATC<br>CAAA-3'     | 5'-<br>GCTCTAGATTAGGCCTGAGTTGAGT<br>C-3' |
